# Supplementary material
Source: MDPI journal article supplement (https://www.mdpi.com/2073-4352/11/12/1570)
Supplement: s1 [file s1]

## Supporting Information

### A 3D lead iodide hybrid based on a 2D perovskite subnetwork

Maroua Ben Haj Salah <sup>1</sup>, Justine Tessier <sup>1</sup>, Nicolas Mercier <sup>1,\*</sup>, Magali Allain,<sup>1</sup> Antonin Leblanc <sup>1</sup>, Xiaoyang Che<sup>2</sup>, Claudine Katan<sup>2</sup> and Mikael Kepenekian <sup>2,\*</sup>

<sup>1</sup> MOLTECH-Anjou, UMR-CNRS 6200, Université d'Angers, 2 Bd Lavoisier, 49045 Angers

<sup>2</sup> Univ Rennes, ENSCR, INSA Rennes, CNRS, ISCR (Institut des Sciences Chimiques de Rennes), UMR 6226, Rennes F-35000, France

**Synthesis of HO-(CH<sub>2</sub>)<sub>3</sub>-NH<sub>3</sub><sup>+</sup>I<sup>-</sup>:** The 3-Amino-1-propanol iodide salt is synthesized from 3-amino-1-propanol and a 57% solution of hydriodic acid (HI). First, the 3-Amino-1-propanol (500 mg) was dissolved in absolute ethanol and cooled to 0 °C. Then, upon stirring, HI (851mg) was slowly added (3-amino-1-propanol and HI in 1:1 stoichiometric amounts). The solution was stirred for 2 h. Then, rotary evaporation was applied to evaporate the solvent with a pressure of 0.1 MPa at 45 °C, giving a white solid. The precipitate was washed three times with diethyl ether and dried under vacuum (60 °C, 5 h).

**(HPA)<sub>6</sub>(MA)Pb<sub>5</sub>I<sub>17</sub>:** Crystals of (HPA)<sub>6</sub>(MA)Pb<sub>5</sub>I<sub>17</sub> (HPA<sup>+</sup>= hydroxypropylammonium or 3-ammonium-1-propanol), were synthesized by liquid-gas slow diffusion method. Lead iodide (300 mg) was first dissolved into hydroiodic acid (1.5mL), in which both methylamine iodide (20.70 mg) and 3-Amino-1-propanol iodide (158 mg) were added in a second step which finally contained the following 3-Amino-1-propanol iodide /methylamine iodide /lead iodide stoichiometry of 6/1/5. The solution was stirred during 20 minutes at room temperature until complete dissolution. This saturated solution was placed into a saturated ethanol vapor atmosphere. After 2 days, crystals were obtained and washed 3 times by ethyl acetate and heated at 40°C during 1 hour. This method gave pure phase of (HPA)<sub>6</sub>(MA)Pb<sub>5</sub>I<sub>17</sub>.

### Single-crystal X-ray diffraction.

X-ray single-crystal diffraction data of  $(\text{HPA})_6(\text{MA})\text{Pb}_5\text{I}_{17}$  were collected at 149K on a Rigaku Oxford Diffraction SuperNova diffractometer equipped with an Atlas CCD detector and micro-focus Cu-K $\alpha$  radiation ( $\lambda = 1.54184 \text{ \AA}$ ). The structure was solved by direct methods, expanded and refined on  $F^2$  by full matrix least-squares techniques using SHELX programs (G. M. Sheldrick 2013, SHELXS 2013/1 and SHELXL 2013/4). All non-H atoms were refined anisotropically and multiscan empirical absorption was corrected using CrysAlisPro program (CrysAlisPro, Agilent Technologies, V1.171.38.41r, 2015). The H atoms were placed at calculated positions and refined using a riding model. The methylammonium cation is positioned on an inversion centre and it has been modeled with two half atoms of nitrogen and carbon positioned at the same place. CCDC-2122380 contains the supplementary crystallographic data for this paper. A summary of crystallographic data and refinement results for this structure is listed in Table 1.

Table S1. Summary of crystal data and structure refinement for  $(\text{HPA})_6(\text{MA})\text{Pb}_5\text{I}_{17}$

|                                   |                                                                                                                                     |
|-----------------------------------|-------------------------------------------------------------------------------------------------------------------------------------|
| Empirical formula                 | C19 H66 I17 N7 O6 Pb5                                                                                                               |
| Formula weight                    | 3682.03                                                                                                                             |
| Temperature                       | 149.3(5) K                                                                                                                          |
| Wavelength                        | 1.54184 Å                                                                                                                           |
| Crystal system, space group       | Triclinic, P -1                                                                                                                     |
| Unit cell dimensions              | a = 8.8709(4) Å      alpha = 111.196(5)°.<br>b = 13.8776(8) Å      beta = 90.710(4)°.<br>c = 15.8097(7) Å      gamma = 105.477(5)°. |
| Volume                            | 1735.93(16) Å <sup>3</sup>                                                                                                          |
| Z, Calculated density             | 1, 3.522 Mg/m <sup>3</sup>                                                                                                          |
| Absorption coefficient            | 82.704 mm <sup>-1</sup>                                                                                                             |
| F(000)                            | 1588                                                                                                                                |
| Crystal size                      | 0.130 x 0.041 x 0.016 mm                                                                                                            |
| Theta range for data collection   | 3.020 to 72.588°                                                                                                                    |
| Limiting indices                  | -10 < h < 10, -17 < k < 15, -19 < l < 18                                                                                            |
| Reflections collected / unique    | 11564 / 6633 [R(int) = 0.0423]                                                                                                      |
| Completeness to theta = 71.000    | 97.80%                                                                                                                              |
| Absorption correction             | Semi-empirical from equivalents                                                                                                     |
| Max. and min. transmission        | 1.00000 and 0.30162                                                                                                                 |
| Refinement method                 | Full-matrix least-squares on F <sup>2</sup>                                                                                         |
| Data / restraints / parameters    | 6633 / 0 / 253                                                                                                                      |
| Goodness-of-fit on F <sup>2</sup> | 1.023                                                                                                                               |
| Final R indices [I > 2sigma(I)]   | R1 = 0.0387, wR2 = 0.0992 [5625 Fo]                                                                                                 |
| R indices (all data)              | R1 = 0.0474, wR2 = 0.1052                                                                                                           |
| Largest diff. peak and hole       | 1.655 and -2.618 e.Å <sup>-3</sup>                                                                                                  |

### Powder X-Ray diffraction

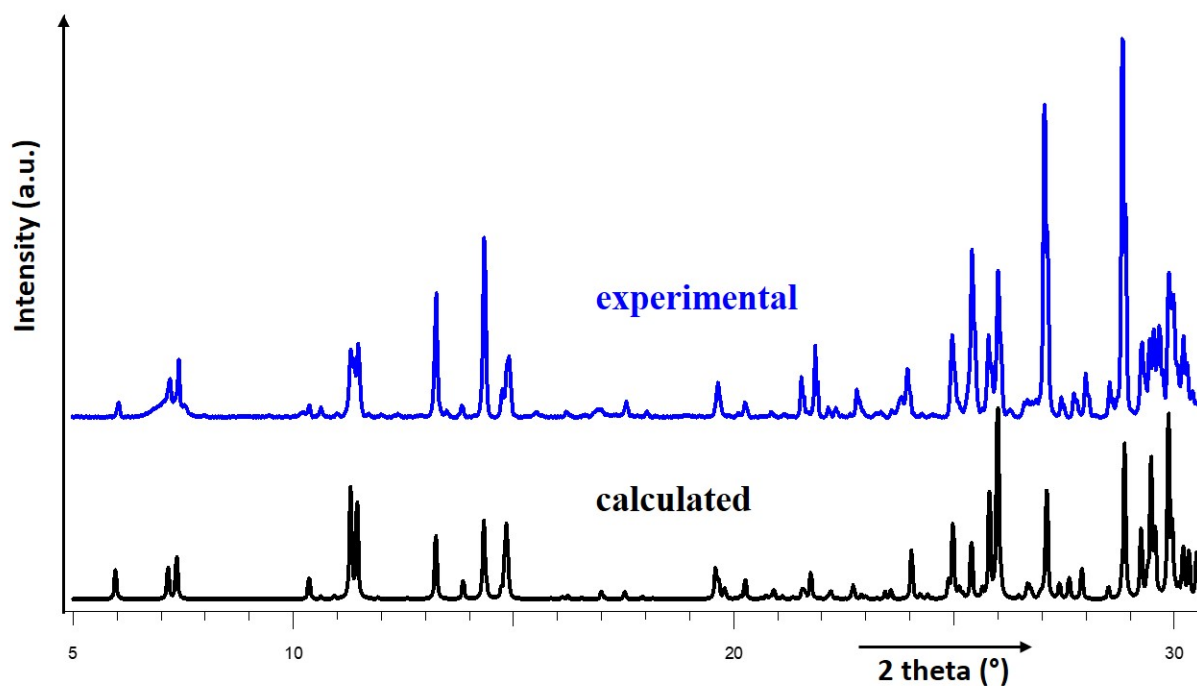

**Figure S1.** Calculated PXRD from single crystal data of the studied crystal of  $(\text{HPA})_6(\text{MA})\text{Pb}_5\text{I}_{17}$  (black -taking the room temperature unit cell:  $a = 8.948 \text{ \AA}$ ,  $b = 13.913 \text{ \AA}$ ,  $c = 16.016 \text{ \AA}$ ,  $\alpha = 111.15^\circ$ ,  $\beta = 90.37^\circ$ ,  $\gamma = 106.49^\circ$ ) and the experimental PXRD of the same phase (blue).

**$^1\text{H}$  NMR**

DMSO : 2.53 ppm

 $\text{H}_2\text{O}$  : 3.55 ppm2 H of  $\text{HO-CH}_2\text{-CH}_2\text{-CH}_2\text{-NH}^+$  : 1.69 ppm3 H of  $\text{CH}_3\text{-NH}_3^+$  : 2.38 ppm2 H of  $\text{HO-CH}_2\text{-CH}_2\text{-CH}_2\text{-NH}$  : 2.89 ppm2 H of  $\text{HO-CH}_2\text{-CH}_2\text{-CH}_2\text{-NH}$  : 3.47 ppm3 H of  $\text{CH}_3\text{-NH}_3^+$  + 3H of  $\text{HO-CH}_2\text{-CH}_2\text{-CH}_2\text{-NH}_3^+$  : 7.61 ppm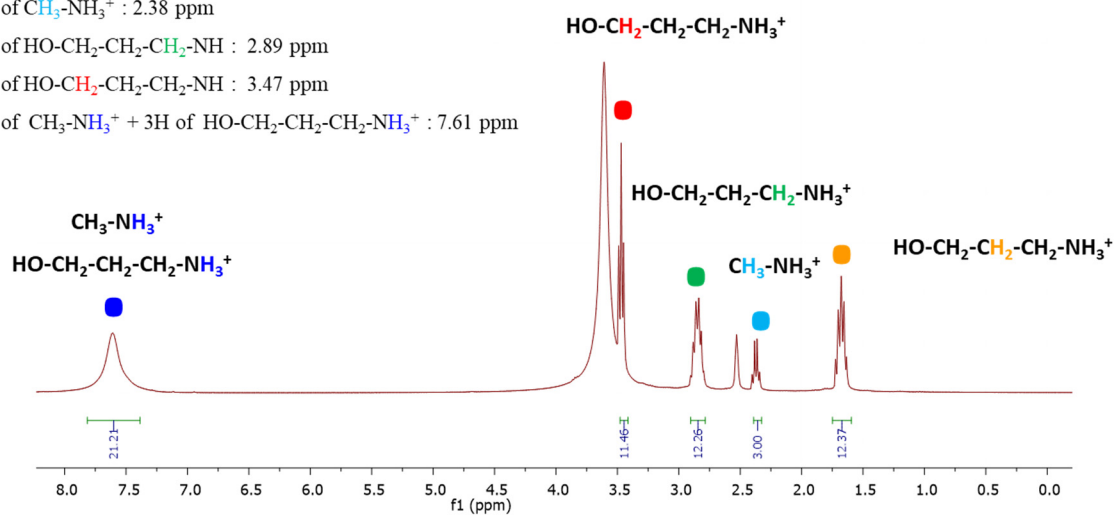

**Figure S2.**  $^1\text{H}$  NMR of  $(\text{HPA})_6(\text{MA})\text{Pb}_5\text{I}_{17}$  in deuterated DMSO solution giving the expected  $\text{HO}(\text{CH}_2)_3\text{NH}_3 / \text{MA}$  ratio of 6.

## TGA

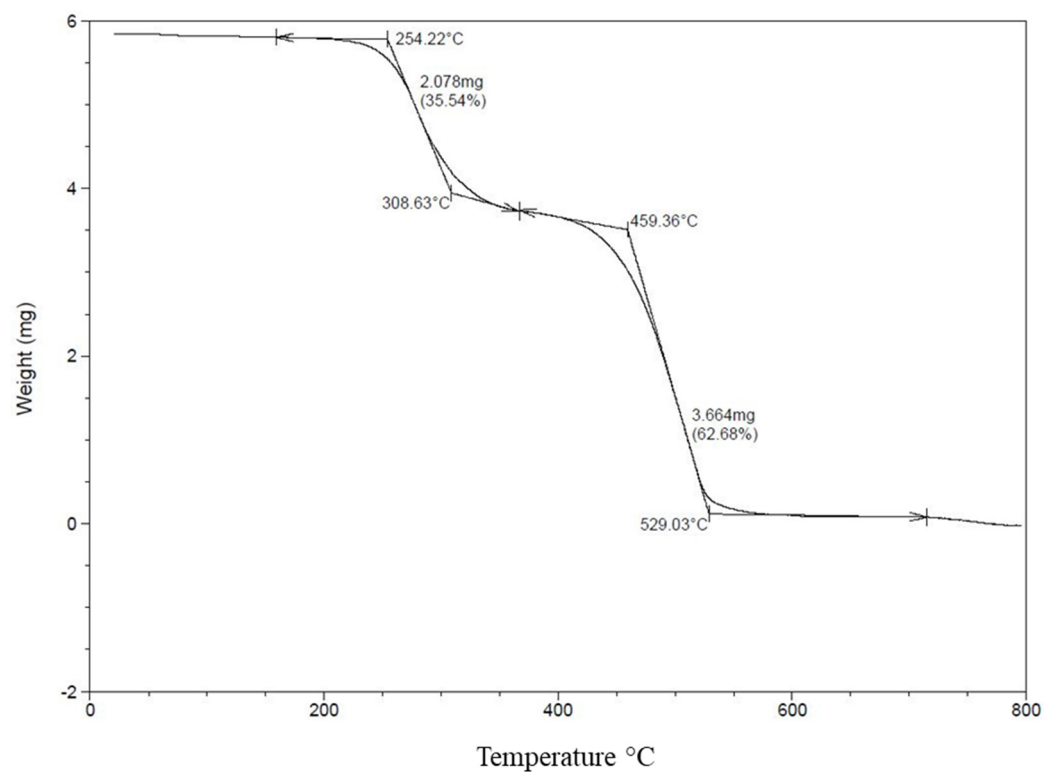

**Figure S3.** TGA curve of (HPA)<sub>6</sub>(MA)Pb<sub>5</sub>I<sub>17</sub> showing a two steps weight loss from 200 °C, the last one corresponding to the loss of PbI<sub>2</sub> (exp: 62.68 %, calculated : 62.60%).

## Stability

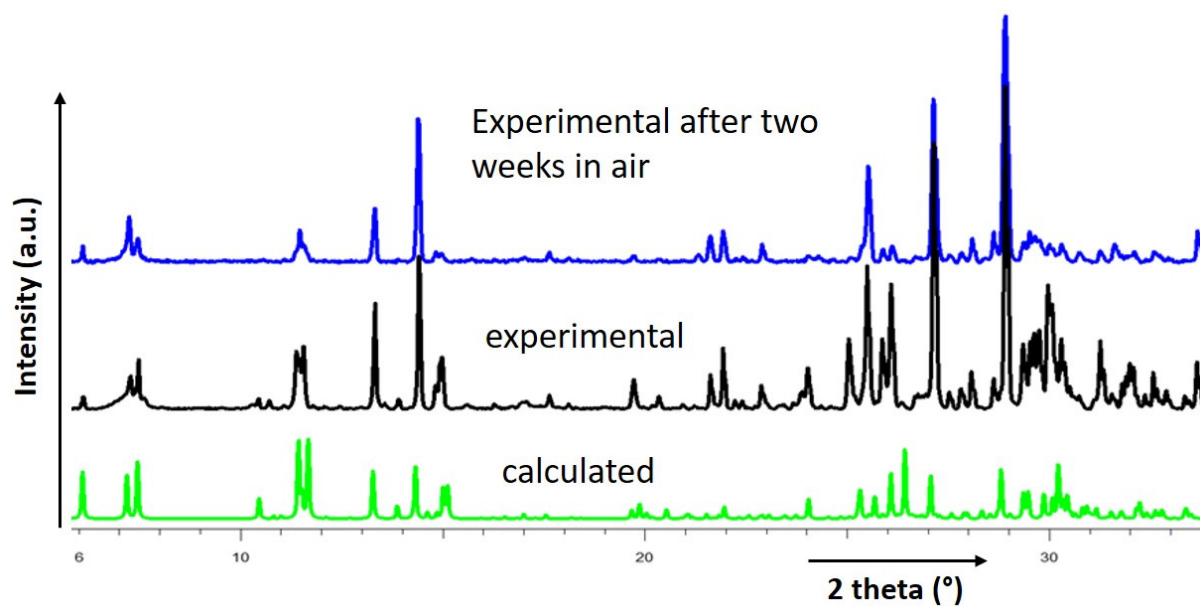

**Figure S4.** PXRD patterns of a fresh prepared crystallized powder of  $(\text{HPA})_6(\text{MA})\text{Pb}_5\text{I}_{17}$  and after two weeks left in the air (green: calculated PXRD).

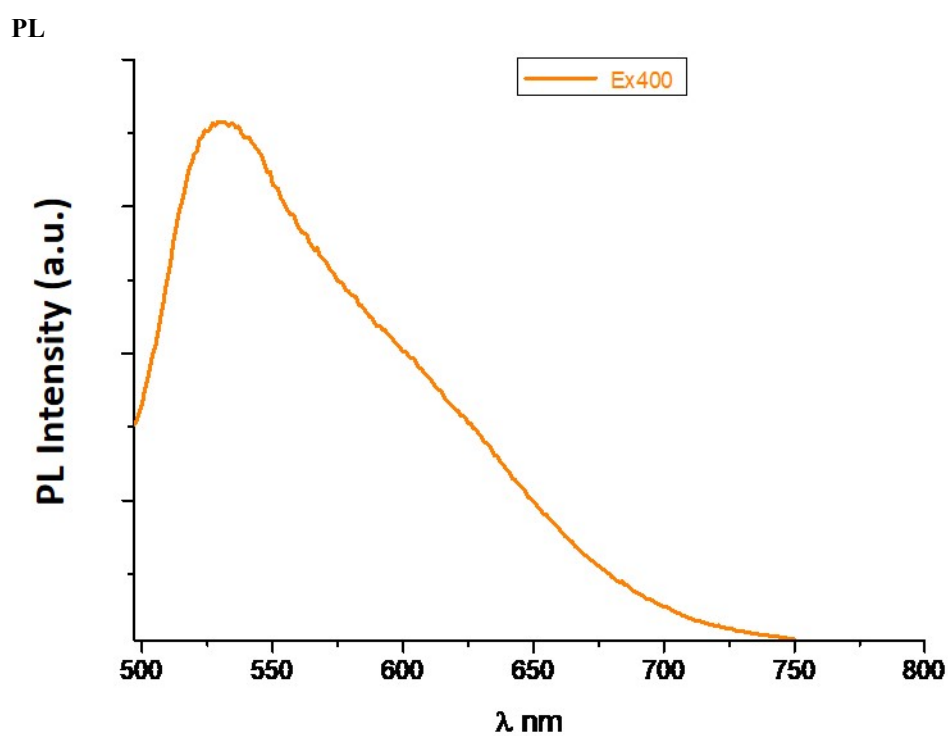

Figure S5. Photoluminescence emission of crystallized powder of  $(\text{HPA})_6(\text{MA})\text{Pb}_5\text{I}_{17}$  (exc: 400 nm).

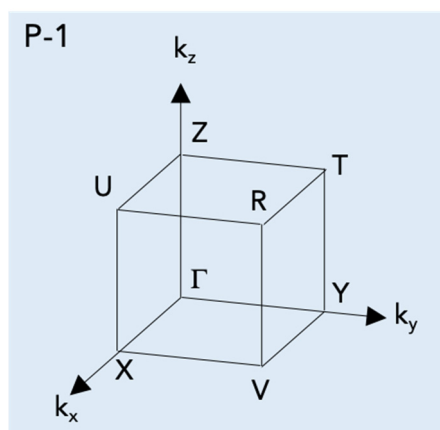

Figure S6. Brillouin zone for the P-1 crystal group.

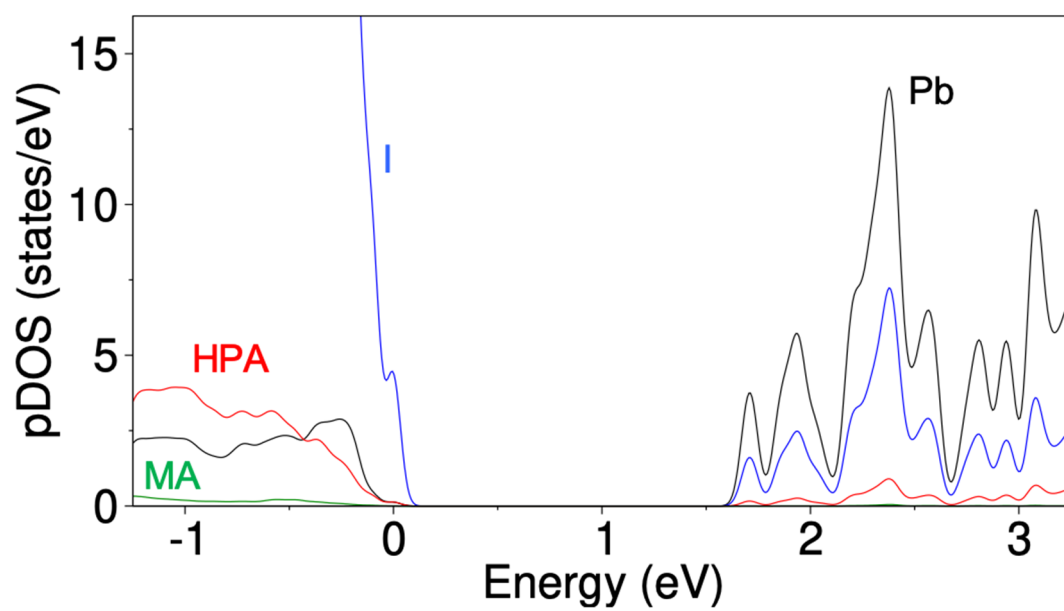

Figure S7. Density of states projected on Pb (black line), I (blue line), HPA (red line) and MA (green line).
